# Supplementary material for: The Xenia Effect Promotes Fruit Quality and Assists in Optimizing Cross Combinations in ‘O’Neal’ and ‘Emerald’ Blueberry
Source: MDPI journal article supplement (doi:10.3390/horticulturae8070659), 2022-07-20
Supplement: s1 [file s1]

## Supporting information

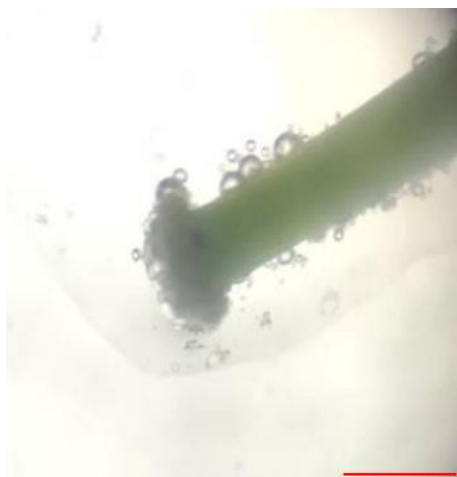

Figure S1. Stigma receptivity analysis of 'O'Neal'

Note: Bar =0.5mm.

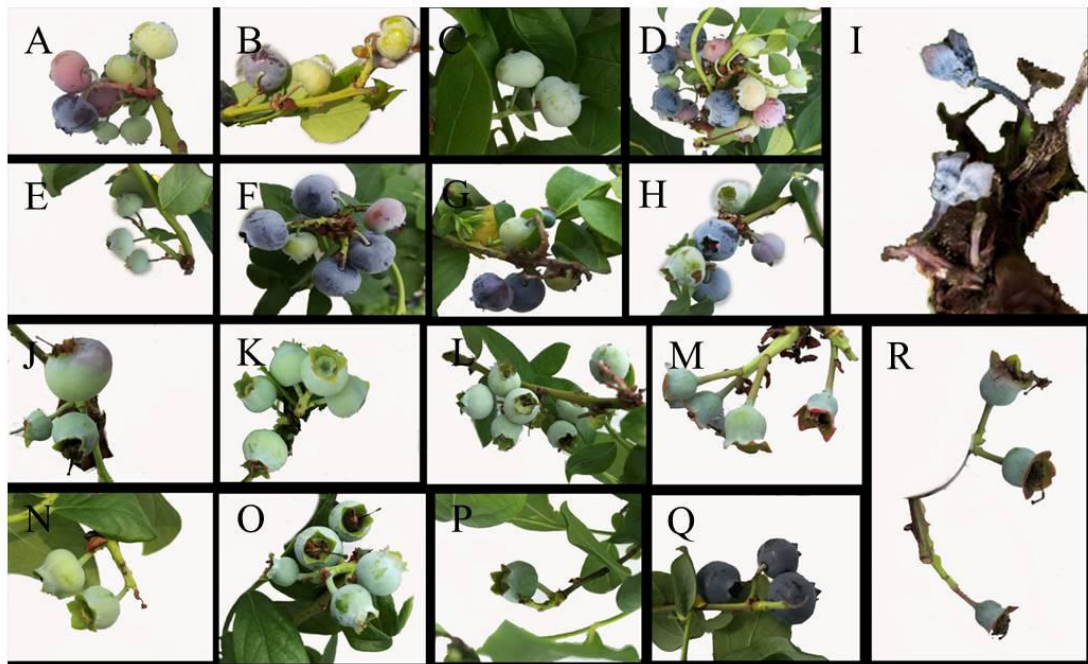

Figure S2. Fruit set status when 'Emerald' and 'O'Neal' pollinated with different SHB pollen donors

A. 'Emerald' × 'Gulfcoast'; B. 'Emerald' × 'Jewel'; C. 'Emerald' × 'Emerald'; D. 'Emerald' × 'Bluerain'; E. 'Emerald' × 'Sharpblue'; F. 'Emerald' × 'Star'; G. 'Emerald' × "8 Mixed"; H. 'Emerald' × 'O'Neal'; I. 'Emerald' × 'Misty'; J. 'O'Neal' × 'Jewel'; K. 'O'Neal' × 'Emerald'; L. 'O'Neal' × 'Bluerain'; M. 'O'Neal' × "8 Mixed"; N. 'O'Neal' × 'Sharpblue'; O. 'O'Neal' × 'Star'; P. 'O'Neal' × 'Misty'; Q. 'O'Neal' × 'O'Neal'; R. 'O'Neal' × 'Gulfcoast';

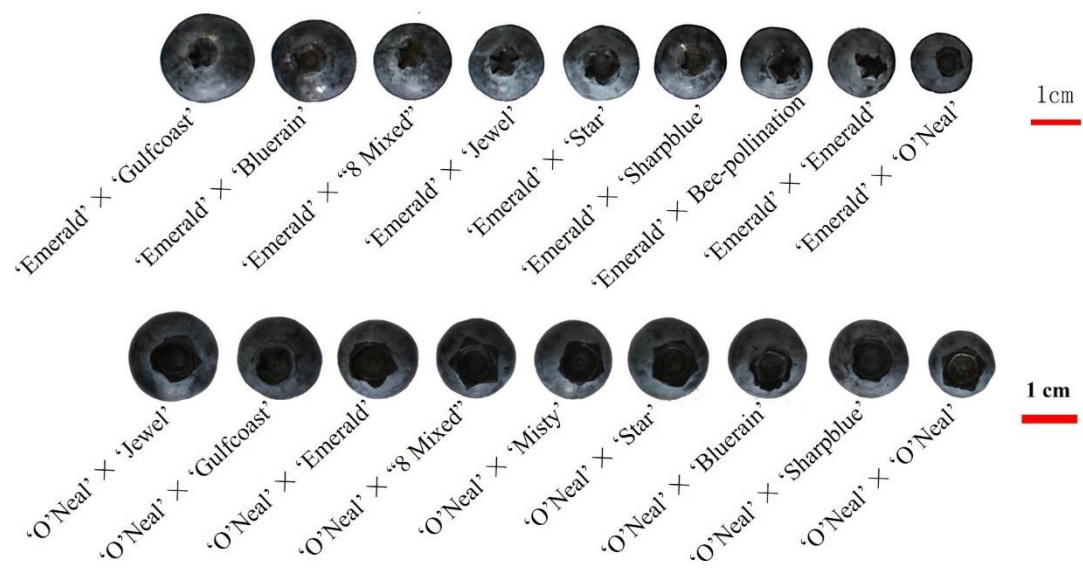

Figure S3. Comparisons of fruit sizes from different pollination combinations

Table S1. Primer sequence of 6 core SSR markers selected in this study

| SSR locus     | Repeat motif | Primer sequence (5'→3')                                    | Production size/bp |
|---------------|--------------|------------------------------------------------------------|--------------------|
| VcSSR11       | (TCA)*5      | F: <Tail>-GCTCCCTCTTTCGCTTCTTT<br>R: CCCCGAAACTATCAGAGCAG  | 308~348            |
| VcSSR14       | (GT)*7       | F: <Tail>-CAGTTTGCACATCACCCCTTG<br>R: ATGGATACATGGACCTTGCC | 184~206            |
| VcSSR19       | (CA)*6       | F: <Tail>-CCAACCCTCGTACTCTTCCA<br>R: CCCACCTCAGAAAACCGATA  | 364~430            |
| VcSSR28       | (GT)*6       | F: <Tail>-GCAGCGAACCCTAAACTCAA<br>R: ACGGAGCTGGCTCACACTAT  | 279~315            |
| VcSSR35       | (ACT)*6      | F: <Tail>-CCCCCACTACTACTTTGCCA<br>R: TATGGCTACGGTTACGGAGG  | 203~212            |
| VcSSR47       | (TCA)*5      | F: <Tail>-CTCCCTTGTTGTTGTTGCCT<br>R: CAACCAACCTCATCCTCACC  | 229~244            |
| Tail sequence |              | <FAM>or<HEX>-TGTA AAAACGACGGCCAGT                          |                    |

Note: "<Tail>-" indicated the tail sequence (5' to 3'); <FAM> and <HEX> meant that 5' ends of the sequences were modified by carboxyfluorescein or hexachlorofluorescein, respectively.

Table S2. Fruit setting ratio of two self-pollination methods

| Cultivar  | Artificial self-pollination | Bagged self-pollination |
|-----------|-----------------------------|-------------------------|
| O'Neal    | 37.62%±8.65% ab             | 15.72%±5.87% c          |
| Misty     | 31.11%±28.41% ab            | 0 a                     |
| Emerald   | 19.64%±7.58% ab             | 0.50%±0.37% a           |
| Sharpblue | 10.10%±3.40% ab             | 0 a                     |
| Jewel     | 7.14%±1.23% a               | 0 a                     |
| Star      | 30.95%±3.37% ab             | 9.54%±3.55% b           |
| Gulfcoast | 22.62%±8.42% ab             | 0 a                     |
| Bluerain  | 44.55%±6.40% b              | 2.45%±1.92% a           |

Note: Difference lowercase letters indicate significant difference at  $P \leq 0.05$  level using Duncan test.

Table S3. The correlation of fruit quality for 'Emerald' as the maternal cultivar

|                       | Firmness | Soluble solids | Anthocyanin content | Titratable acidity | Soluble sugar | SS/TA  | Transverse diameter | Longitudinal diameter | Fruit shape index | Fruit weight |
|-----------------------|----------|----------------|---------------------|--------------------|---------------|--------|---------------------|-----------------------|-------------------|--------------|
| Firmness              | 1        | -0.187         | 0.27                | -0.083             | -.763*        | -0.614 | -0.628              | -.791*                | 0.131             | -0.702       |
| Soluble solids        |          | 1              | 0.207               | 0.506              | 0.185         | -0.049 | -0.03               | 0.377                 | 0.453             | 0.119        |
| Anthocyanin content   |          |                | 1                   | -0.507             | 0.18          | 0.36   | 0.08                | -0.096                | -0.306            | 0.093        |
| Titratable acidity    |          |                |                     | 1                  | -0.168        | -0.604 | -0.235              | 0.161                 | 0.619             | -0.133       |
| Soluble sugar         |          |                |                     |                    | 1             | .852** | .826*               | .853**                | -0.444            | .869**       |
| SS/TA                 |          |                |                     |                    |               | 1      | 0.647               | 0.567                 | -0.478            | 0.65         |
| Transverse diameter   |          |                |                     |                    |               |        | 1                   | .830*                 | -.768*            | .985**       |
| Longitudinal diameter |          |                |                     |                    |               |        |                     | 1                     | -0.284            | .894**       |
| Fruit shape index     |          |                |                     |                    |               |        |                     |                       | 1                 | -0.668       |
| Fruit weight          |          |                |                     |                    |               |        |                     |                       |                   | 1            |

\*\*, \*, indicate significance at  $P < 0.01$ ,  $P < 0.05$ , respectively.

Table S4. The correlation of fruit quality for 'O'Neal' as the maternal cultivar

|                          | Firmness | Soluble<br>solids | Anthocyanin<br>content | Titratable<br>acidity | Soluble<br>sugar | SS/TA  | Transverse<br>diameter | Longitudinal<br>diameter | Fruit<br>shape<br>index | Fruit<br>weight |
|--------------------------|----------|-------------------|------------------------|-----------------------|------------------|--------|------------------------|--------------------------|-------------------------|-----------------|
| Firmness                 | 1        | -0.338            | 0.432                  | -0.516                | 0.448            | 0.679  | 0.321                  | 0.399                    | -0.068                  | 0.127           |
| Soluble<br>solids        |          | 1                 | -0.315                 | 0.406                 | 0.271            | 0.096  | -.758*                 | -.867**                  | 0.31                    | -.679*          |
| Anthocyanin<br>content   |          |                   | 1                      | -.745*                | 0.145            | 0.551  | 0.558                  | 0.614                    | -0.276                  | 0.47            |
| Titratable<br>acidity    |          |                   |                        | 1                     | 0.139            | -0.425 | -0.313                 | -0.456                   | -0.068                  | -0.148          |
| Soluble sugar            |          |                   |                        |                       | 1                | .832*  | 0.144                  | -0.035                   | -0.461                  | 0.076           |
| SS/TA                    |          |                   |                        |                       |                  | 1      | 0.229                  | 0.152                    | -0.312                  | 0.079           |
| Transverse<br>diameter   |          |                   |                        |                       |                  |        | 1                      | .962**                   | -.810**                 | .966**          |
| Longitudinal<br>diameter |          |                   |                        |                       |                  |        |                        | 1                        | -0.623                  | .904**          |
| Fruit shape<br>index     |          |                   |                        |                       |                  |        |                        |                          | 1                       | -.846**         |
| Fruit weight             |          |                   |                        |                       |                  |        |                        |                          |                         | 1               |

\*\* , \* , indicate significance at  $P < 0.01$ ,  $P < 0.05$ , respectively.

Table S5. The correlation coefficient range of fruit quality, fruit setting ratio and seed number

for ‘Emerald’ as the maternal cultivar

|                          | Transverse<br>diameter | Longitudinal<br>diameter | Fruit<br>shape<br>index | Fruit<br>weight | Firmness | Soluble<br>solids | Anthocyani<br>n content | Titratabl<br>e acidity | Solubl<br>e sugar | SS/TA  | Seed<br>number | Fruit<br>setting<br>ratio |
|--------------------------|------------------------|--------------------------|-------------------------|-----------------|----------|-------------------|-------------------------|------------------------|-------------------|--------|----------------|---------------------------|
| Transverse<br>diameter   | 1                      | .830*                    | -.768*                  | .985**          | -0.628   | -0.03             | 0.08                    | -0.235                 | .826*             | 0.647  | 0.441          | .809*                     |
| Longitudinal<br>diameter |                        | 1                        | -0.284                  | .894**          | -.791*   | 0.377             | -0.096                  | 0.161                  | .853**            | 0.567  | 0.446          | .807*                     |
| Fruit shape<br>index     |                        |                          | 1                       | -0.668          | 0.131    | 0.453             | -0.306                  | 0.619                  | -0.444            | -0.478 | -0.281         | -0.495                    |
| Fruit weight             |                        |                          |                         | 1               | -0.702   | 0.119             | 0.093                   | -0.133                 | .869**            | 0.65   | 0.52           | .851**                    |
| Firmness                 |                        |                          |                         |                 | 1        | -0.187            | 0.27                    | -0.083                 | -.763*            | -0.614 | -0.197         | -0.54                     |
| Soluble<br>solids        |                        |                          |                         |                 |          | 1                 | 0.207                   | 0.506                  | 0.185             | -0.049 | 0.669          | 0.277                     |
| Anthocyanin<br>content   |                        |                          |                         |                 |          |                   | 1                       | -0.507                 | 0.18              | 0.36   | 0.62           | 0.424                     |
| Titrateable<br>acidity   |                        |                          |                         |                 |          |                   |                         | 1                      | -0.168            | -0.604 | -0.037         | -0.184                    |
| Soluble<br>sugar         |                        |                          |                         |                 |          |                   |                         |                        | 1                 | .852** | 0.535          | .935**                    |
| SS/TA                    |                        |                          |                         |                 |          |                   |                         |                        |                   | 1      | 0.369          | .775*                     |
| Seed number              |                        |                          |                         |                 |          |                   |                         |                        |                   |        | 1              | 0.674                     |
| Fruit setting<br>ratio   |                        |                          |                         |                 |          |                   |                         |                        |                   |        |                | 1                         |

\*\* , \* , indicate significance at  $P < 0.01$ ,  $P < 0.05$ , respectively.



**Table S6.** The correlation coefficient range of fruit quality, fruit setting ratio and seed number for ‘O’Neal’ as the maternal cultivar

|                          | Transverse<br>diameter | Longitudinal<br>diameter | Fruit<br>shape<br>index | Fruit<br>weight | Firmness | Soluble<br>solids | Anthocy<br>anin<br>content | Titratabl<br>e acidity | Solubl<br>e sugar | SS/TA  | Seed<br>number | Fruit<br>setting<br>ratio |
|--------------------------|------------------------|--------------------------|-------------------------|-----------------|----------|-------------------|----------------------------|------------------------|-------------------|--------|----------------|---------------------------|
| Transverse<br>diameter   | 1                      | .962**                   | -.810**                 | .966**          | 0.321    | -.758*            | 0.558                      | -0.313                 | 0.144             | 0.229  | 0.116          | 0.16                      |
| Longitudinal<br>diameter |                        | 1                        | -0.623                  | .904**          | 0.399    | -.867**           | 0.614                      | -0.456                 | -0.035            | 0.152  | 0.125          | 0.079                     |
| Fruit shape<br>index     |                        |                          | 1                       | -.846**         | -0.068   | 0.31              | -0.276                     | -0.068                 | -0.461            | -0.312 | -0.02          | -0.235                    |
| Fruit weight             |                        |                          |                         | 1               | 0.127    | -.679*            | 0.47                       | -0.148                 | 0.076             | 0.079  | 0.02           | 0.003                     |
| Firmness                 |                        |                          |                         |                 | 1        | -0.338            | 0.432                      | -0.516                 | 0.448             | 0.679  | 0.491          | 0.291                     |
| Soluble solids           |                        |                          |                         |                 |          | 1                 | -0.315                     | 0.406                  | 0.271             | 0.096  | -0.026         | 0.053                     |
| Anthocyanin<br>content   |                        |                          |                         |                 |          |                   | 1                          | -.745*                 | 0.145             | 0.551  | 0.296          | 0.32                      |
| Titratable<br>acidity    |                        |                          |                         |                 |          |                   |                            | 1                      | 0.139             | -0.425 | 0.04           | -0.272                    |
| Soluble sugar            |                        |                          |                         |                 |          |                   |                            |                        | 1                 | .832*  | 0.612          | .797*                     |
| SS/TA                    |                        |                          |                         |                 |          |                   |                            |                        |                   | 1      | 0.557          | .864**                    |
| Seed number              |                        |                          |                         |                 |          |                   |                            |                        |                   |        | 1              | 0.643                     |
| Fruit setting<br>ratio   |                        |                          |                         |                 |          |                   |                            |                        |                   |        |                | 1                         |

\*\* , \*, indicate significance at  $P < 0.01$ ,  $P < 0.05$ , respectively.

**Table S7. Characteristic eigenvalue and accumulative contribution rate of each principal component**

| <b>Maternal<br/>cultivar</b> | Principal<br>component | Eigenvalue | Contribution<br>rate % | Cumulative<br>percentage % | <b>Maternal<br/>cultivar</b> | Principal<br>component | Eigenvalue | Contribution<br>rate % | Cumulative<br>percentage % |
|------------------------------|------------------------|------------|------------------------|----------------------------|------------------------------|------------------------|------------|------------------------|----------------------------|
| Emerald                      | PC 1                   | 5.33       | 53.26                  | 53.26                      | O’Neal                       | PC 1                   | 4.99       | 49.85                  | 49.85                      |
|                              | PC 2                   | 2.32       | 23.23                  | 76.49                      |                              | PC 2                   | 2.43       | 24.29                  | 74.14                      |
|                              | PC 3                   | 1.48       | 14.78                  | 91.27                      |                              | PC 3                   | 1.22       | 12.20                  | 86.34                      |

**Table S8. Component loading table for ‘Emerald’ and ‘O’Neal’ as the maternal cultivar**

| Maternal<br>cultivar:<br>‘Emerald’ | Factor | Firmness | Soluble<br>solids | Anthocyanin | Titrateable<br>acidity<br>(TA) | Soluble<br>sugar<br>(SS) | SS/TA | Transverse<br>diameter | Longitudinal<br>diameter | Fruit<br>shape<br>index | Fruit<br>weight |
|------------------------------------|--------|----------|-------------------|-------------|--------------------------------|--------------------------|-------|------------------------|--------------------------|-------------------------|-----------------|
|                                    | PC 1   | -0.77    | 0.07              | 0.17        | -0.30                          | 0.95                     | 0.84  | 0.95                   | 0.87                     | -0.66                   | 0.96            |
|                                    | PC 2   | -0.41    | 0.66              | -0.49       | 0.91                           | 0.11                     | -0.32 | 0.00                   | 0.45                     | 0.56                    | 0.14            |
|                                    | PC 3   | 0.12     | 0.70              | 0.84        | -0.11                          | 0.16                     | 0.27  | -0.21                  | 0.02                     | 0.32                    | -0.11           |
| Maternal<br>cultivar:<br>‘O’Neal’  | Factor | Firmness | Soluble<br>solids | Anthocyanin | Titrateable<br>acidity<br>(TA) | Soluble<br>sugar<br>(SS) | SS/TA | Transverse<br>diameter | Longitudinal<br>diameter | Fruit<br>shape<br>index | Fruit<br>weight |
|                                    | PC 1   | 0.46     | -0.83             | 0.76        | -0.44                          | -0.14                    | 0.04  | 0.98                   | 0.98                     | -0.72                   | 0.94            |
|                                    | PC 2   | 0.14     | -0.14             | -0.15       | 0.73                           | 0.98                     | 0.90  | 0.14                   | 0.05                     | -0.21                   | 0.02            |
|                                    | PC 3   | 0.80     | -0.37             | -0.07       | -0.23                          | -0.05                    | 0.19  | -0.14                  | 0.05                     | 0.48                    | -0.31           |
